# Supplementary material for: Self-aggregation, H-bonding, and photoresponse in film and solution states of azobenzene containing polyurea
Source: Royal Society of Chemistry journal article supplement (doi:10.1039/d2cp01200f), 2022-01-01
Supplement: d2cp01200f1.pdf [file d2cp01200f1.pdf]

## SUPPORTING INFORMATION

### Self-aggregation, H-bonding, and Photoresponse in Film and Solution States of Azobenzene Containing Polyurea

Swathi Ereka<sup>\*1</sup>, Kalyani Chordiya<sup>\*†2,3</sup>, K. V. Vidhya<sup>1</sup>, Mousumi Upadhyay Kahaly<sup>‡2,3</sup>, and Sreeram K. Kalpathy<sup>§1</sup>

<sup>1</sup>Department of Metallurgical and Materials Engineering, Indian Institute of Technology Madras, Chennai - 600036, India

<sup>2</sup>ELI-ALPS, ELI-HU Non-Profit Ltd., Wolfgang Sandner utca 3., Szeged, H-6728, Hungary

<sup>3</sup>Institute of Physics, University of Szeged, Dóm tér 9, H-6720 Szeged, Hungary.

---

\*equal contribution

†equal contribution

‡Corresponding Author. Email: mousumi.upadhyayKahaly@eli-alps.hu

§Corresponding Author. Email: sreeram@iitm.ac.in

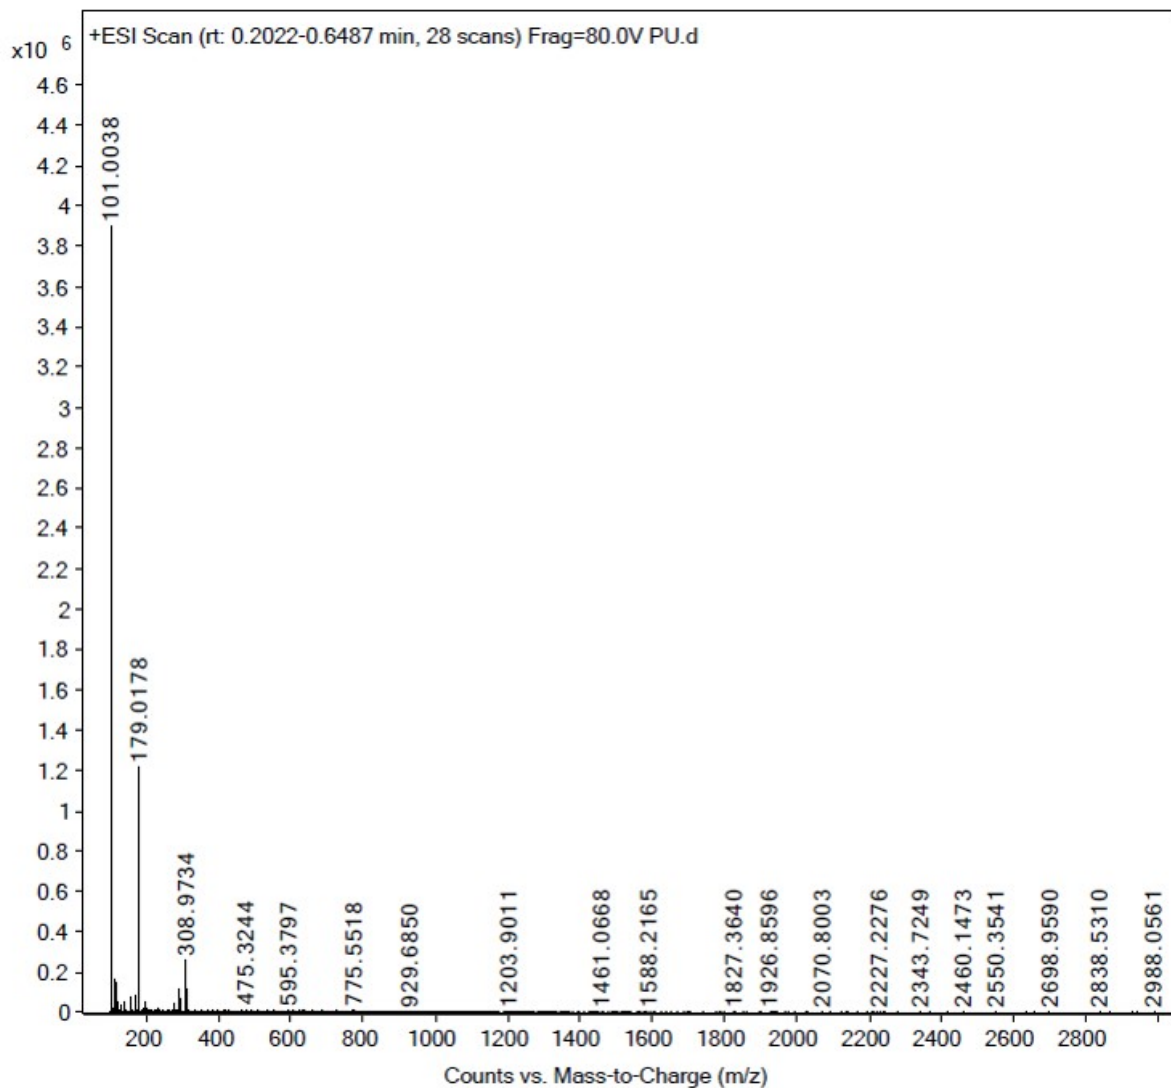

Figure S1: Electrospray ionization (ESI) spectrum of azo-PU. The average molecular weight was calculated using the first nine peaks of this spectrum using the free version of ESIprot Online software)

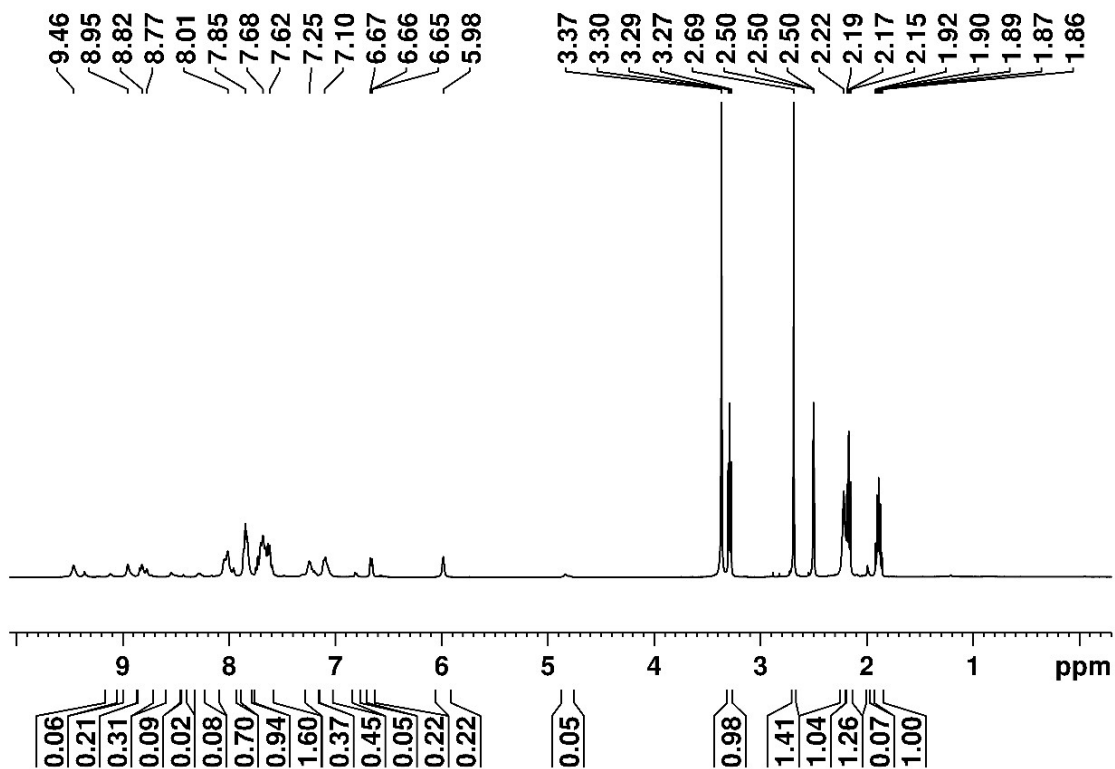

Figure S2:  $^1\text{H}$  NMR spectrum of azo-PU powder in  $\text{DMSO-}d_6$ . The spectrum shows chemical shifts between 6 and 9.5 ppm which correspond to the protons in urea group, while the multiple peaks between  $\delta$  1.86 - 2.69 ppm correspond to the resonance peaks of the methyl protons [1, 2].

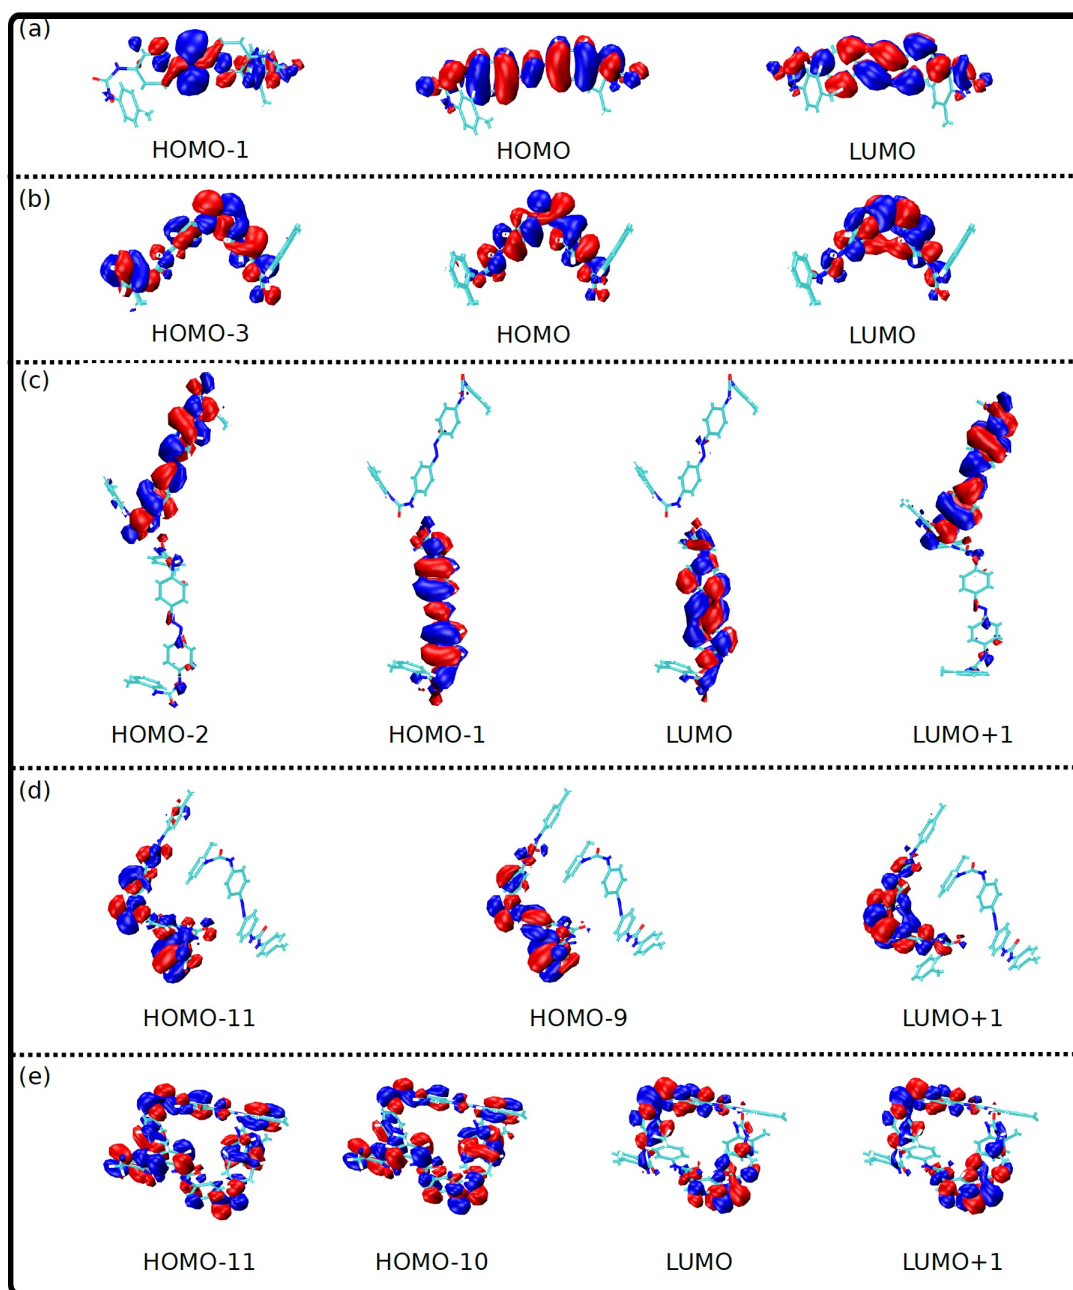

Figure S3: Molecular orbital (orbital type) iso-surface for: (a) trans-monomer in gas phase, (b) cis-monomer in gas phase, (c) trans-dimer in DMF, (d) H-aggregated cis-dimer *without* hydrogen bonding and (e) H-aggregated cis-dimer *with* hydrogen bonding (iso-value 0.02, colours show opposite spin).

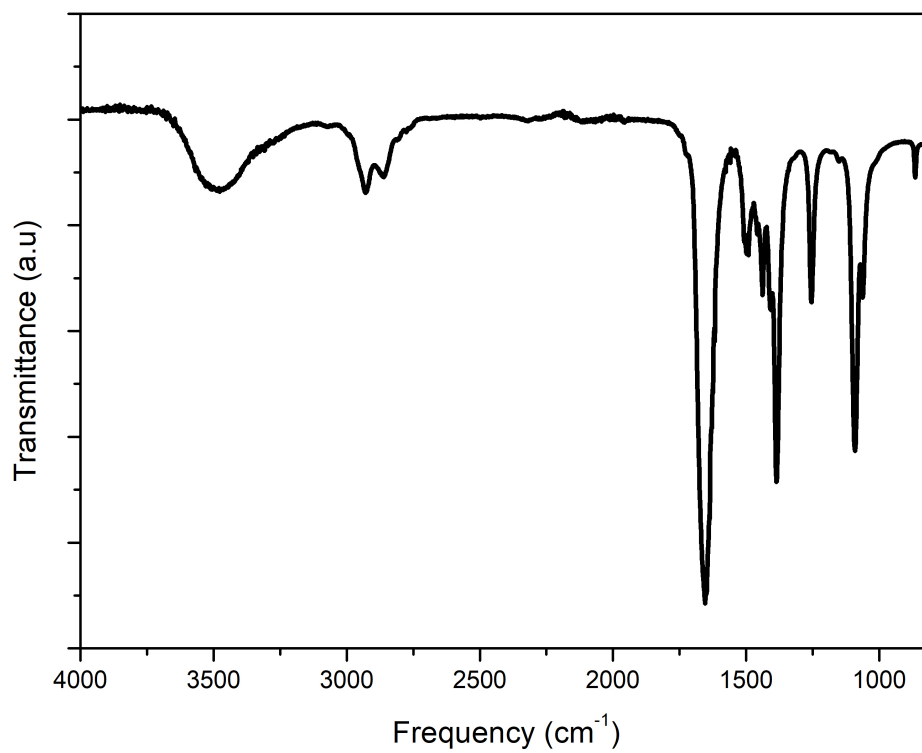

Figure S4: IR spectrum of cis isomer of azo-PU solution. The spectrum of cis azo-PU solution was recorded after exposing azo-PU solution to 365 nm light for 20 min.

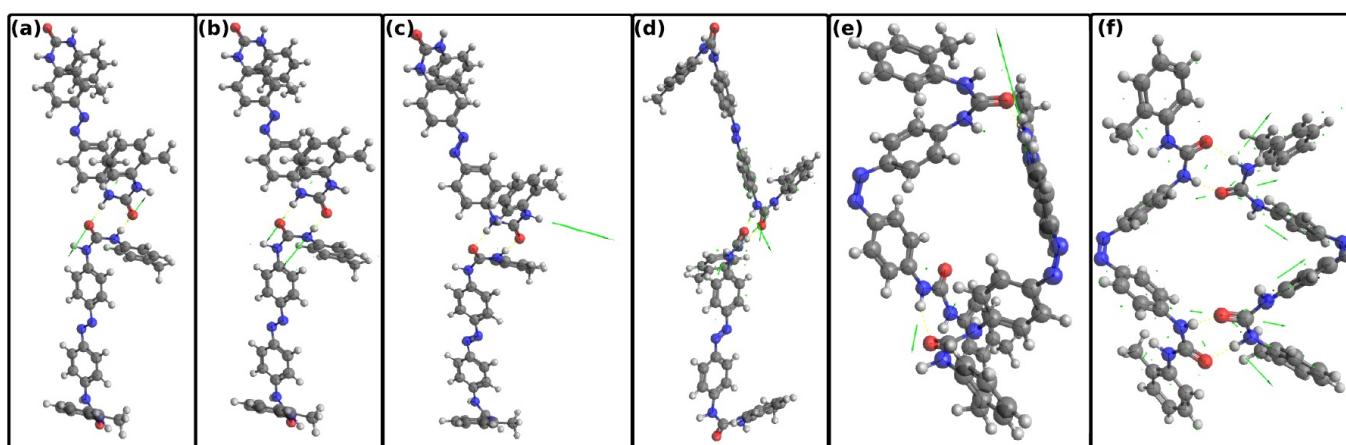

Figure S5: Force vectors for vibrational modes along N-H bond stretching, force vectors shown as green arrows: (a) trans dimer in DMF phase (at  $3284\text{ cm}^{-1}$ ) representing  $\text{C}=\text{O}\leftrightarrow\text{N-H}$  anti-symmetric stretching, (b) trans dimer in DMF phase (at  $3309\text{ cm}^{-1}$ ) representing  $\text{C}=\text{O}\leftrightarrow\text{N-H}$  symmetric stretching, (c) trans dimer in DMF phase  $3575\text{ cm}^{-1}$  representing N-H symmetric stretching and (d) H-aggregated cis-dimer in DMF solvent (at  $3487\text{ cm}^{-1}$ ).

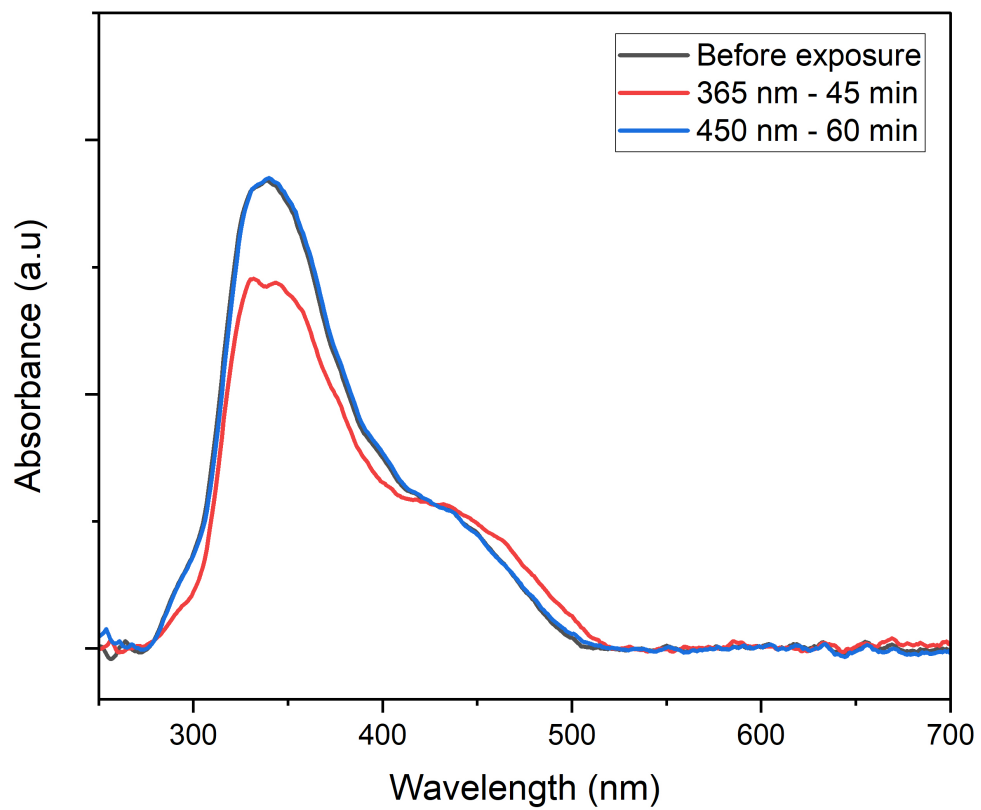

Figure S6: UV-visible absorbance spectra of azo-PU thin film when subjected to 365 nm light for 45 min followed by 450 nm light for 60 min

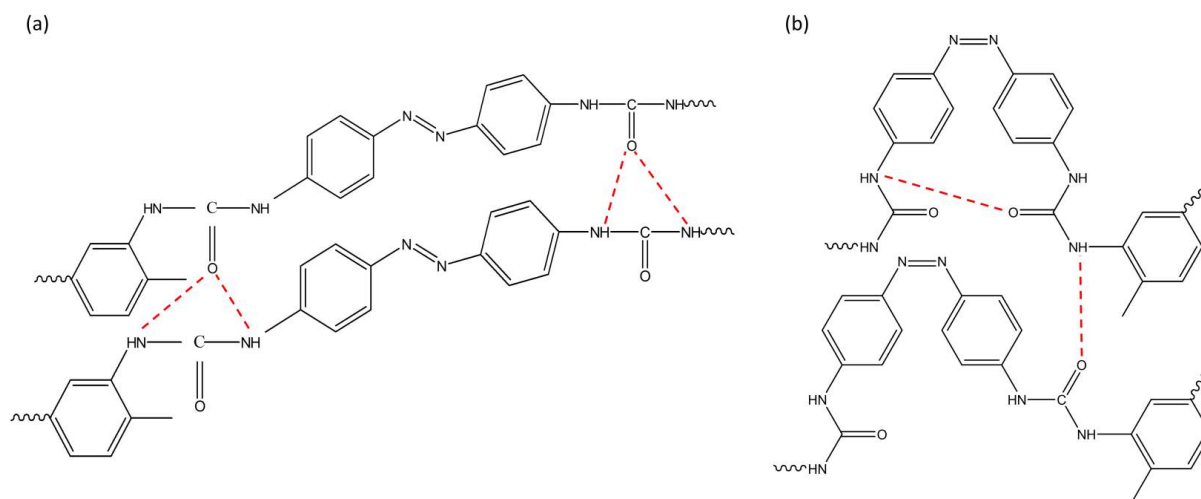

Figure S7: Hydrogen bonding possibilities, denoted by the red dashed lines, that can exist in dimers of (a) trans azo-PU and (b) cis azo-PU. The coplanarity of azo groups and aromatic rings in trans azo-PU provides greater chances of hydrogen atoms being proximal and bonded to the electronegative oxygen atoms, but the out-of-plane configuration in cis azo-PU makes it more difficult. We note that these are 2-D schematics; the azo group and urea groups in cis azo-PU are actually in different planes in 3-D.



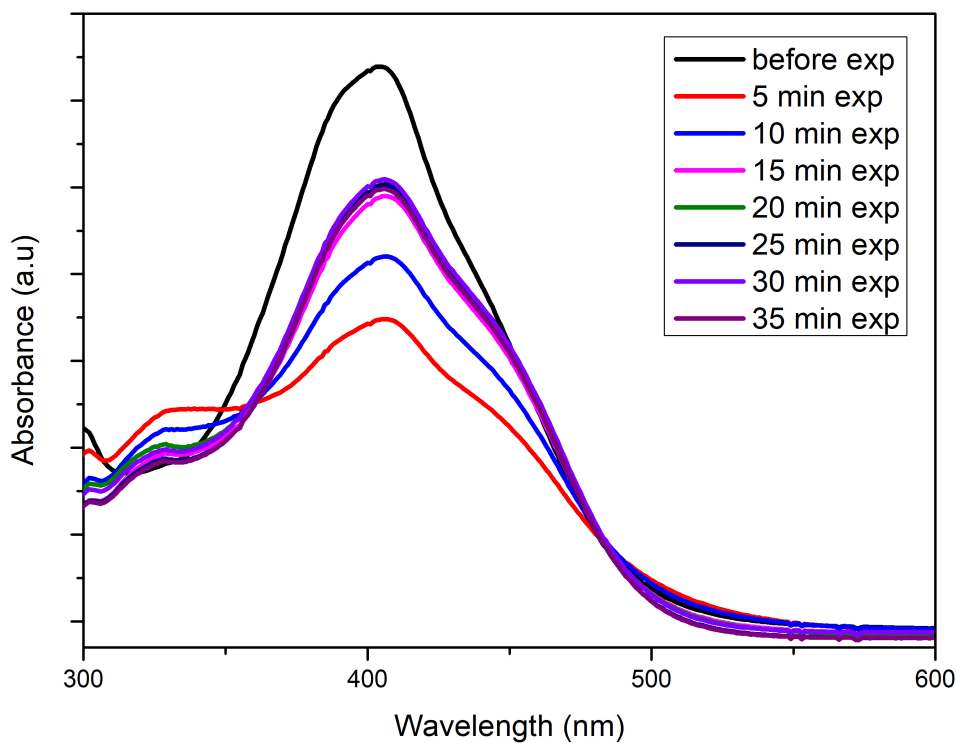

Figure S8: Time dependent UV-visible absorption spectra of azo-PU solution in DMF. The solution was exposed to UV light of 365 nm and the photostationary state was observed to occur at around 20 min. The cis/trans ratio may be estimated based on the changes in intensities of the absorption peaks over different times of 365 nm UV irradiation [3, 4, 5]. It is assumed that all the trans isomers were converted to the cis form after sufficiently long exposure, and this is used as a reference state. This may be a reasonable assumption, as cis isomers have greater stability in solution compared to azo-PU in solid state. Since the two bands overlap before exposure of azo-PU solution, the cis/trans ratio cannot be calculated precisely prior to exposure. The cis : trans ratios were estimated as 57.9 : 42.1, 75.8 : 24.2, and 99.2 : 0.8 after 5, 10, and 15 min of UV exposure. Finally, at 20 min of UV exposure (the photostationary state), 100% cis isomers is attained, which is the reference state for the calculation.

## References

- [1] Hui Han et al. “One step preparation of porous polyurea by reaction of toluene diisocyanate with water and its characterization”. In: *RSC advances* 4.63 (2014), pp. 33520–33529.
- [2] Wei-Guang Qiu et al. “NMR analysis to identify biuret groups in common polyureas”. In: *Chinese Journal of Polymer Science* 36.10 (2018), pp. 1150–1156.
- [3] Karolina Bujak et al. “Photoinduced properties of “T-type” polyimides with azobenzene or azopyridine moieties”. In: *European Polymer Journal* 126 (2020), p. 109563.
- [4] Zhiyong Li et al. “Photo-isomerization and light-modulated aggregation behavior of azobenzene-based ionic liquids in aqueous solutions”. In: *RSC advances* 7.71 (2017), pp. 44688–44695.
- [5] Yuriy Zakrevskyy et al. “Light-controlled reversible manipulation of microgel particle size using azobenzene-containing surfactant”. In: *Advanced Functional Materials* 22.23 (2012), pp. 5000–5009.
